# Supplementary material for: Tristetraprolin Is a Prognostic Biomarker for Poor Outcomes among Patients with Low-Grade Prostate Cancer
Source: Oxford University Press journal article supplement (doi:10.1158/1055-9965.epi-18-0369), 2018-08-14
Supplement: 10559965epi180369-sup-199611_2_supp_4878613_pbk41c.docx [file 10559965epi180369-sup-199611_2_supp_4878613_pbk41c.docx]

| **Supplementary Table S1. Prostate Cancer Patient Study Cohorts** | | | | | | | | |
| --- | --- | --- | --- | --- | --- | --- | --- | --- |
| **Cohort Name** | **Taylor et al. (20)** | **Das et al. (21, 22)** | **Ross et al. (24)** | **Karnes et al. (25)** | **Klein et al. (27)** | **TCGA PRAD (28)** | **Mahajan et al. (23)** | **Erho et al. (26)** |
| Type of Study | Cohort | Cohort | Case-Cohort | Case-Cohort | Case-Control | Cohort | Cohort | Case-Control |
| Outcome Analyzed | BCR | BCR | BCR and Metastasis | BCR and Metastasis | BCR and Metastasis | BCR | BCR | Metastasis |
| Molecular Analysis | Affymetrix | qRT-PCR | Affymetrix | Affymetrix | Affymetrix | RNA-Seq | IHC | Affymetrix |
| Total Patients Analyzed | 131 | 306 | 260 | 235 | 182 | 280 | 153 | 545 |
| Patients w/ No BCR | 104 | 206 | 129 | 110 | 130 | 246 | 93 | - |
| Patients w/ BCR | 27 | 100 | 131 | 125 | 52 | 34 | 60 | - |
| Patients w/ No METS | - | - | 161 | 159 | 133 | - | - | 333 |
| Patients w/ METS | - | - | 99 | 76 | 49 | - | - | 212 |
| Abbreviations: BCR, biochemical recurrence; qRT-PCR, quantitative Real Time-PCR; METS, metastasis; w/, with; RNA-Seq, RNA-sequencing; IHC, immunohistochemistry | | | | | | | | |
